# Supplementary material
Source: PubMed Central journal article supplement (PMC4562423)
Supplement: NIHMS682744-supplement-1.pdf [file NIHMS682744-supplement-1.pdf]

## Supplementary Figures

Title: Programmed death-1 controls T cell survival by regulating oxidative metabolism

Authors: Victor Tkachev<sup>\*</sup>, Stefanie Goodell<sup>\*</sup>, Anthony W. Pipari<sup>†</sup>, Ling-Yang Hao<sup>‡</sup>, Luigi Franchi<sup>‡</sup>, Gary D. Glick<sup>§</sup>, James L.M. Ferrara<sup>\*</sup> and Craig A. Byersdorfer<sup>¶</sup>

<sup>\*</sup>Department of Pediatrics, University of Michigan, Ann Arbor, MI 48109

<sup>†</sup>Department of Obstetrics and Gynecology, University of Michigan, Ann Arbor, MI 48109

<sup>‡</sup>Lycera Corporation, 2800 Plymouth Rd, Ann Arbor, MI 48109

<sup>§</sup>Department of Chemistry, University of Michigan, Ann Arbor, MI 48109

<sup>¶</sup>Division of Blood and Marrow Transplant and Cellular Therapies, Department of Pediatrics, University of Pittsburgh School of Medicine, Pittsburgh PA 15224

Contents:

4 Supplemental Figures and Legends

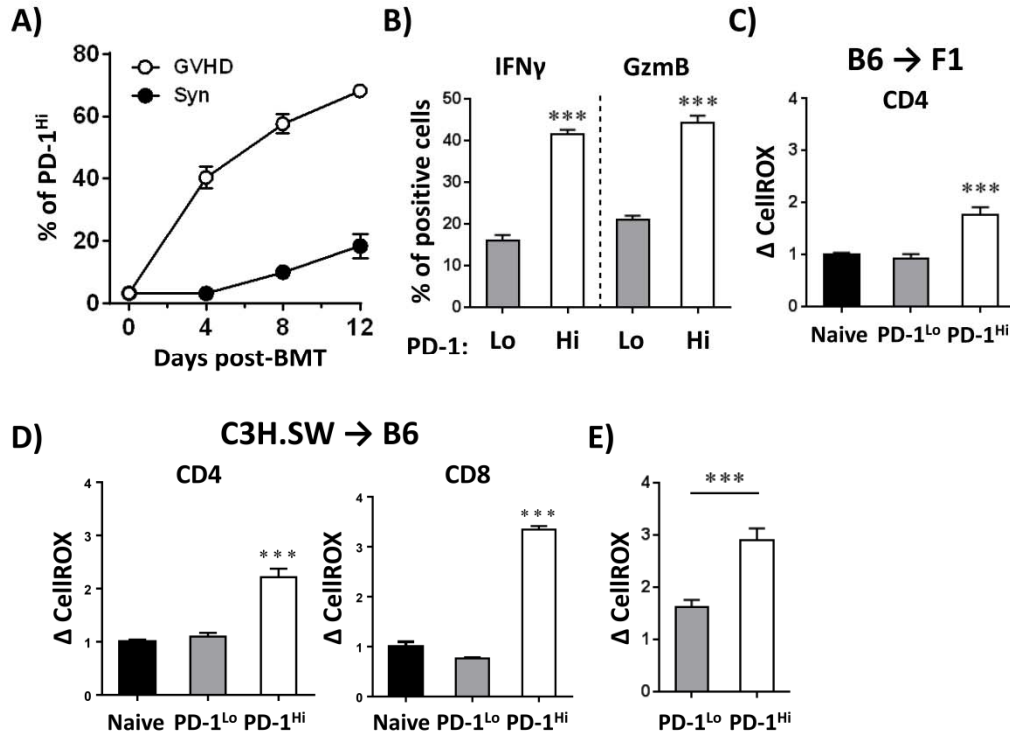

**Supplementary Figure 1. Donor CD4 T cells simultaneously increase PD-1 and ROS levels post allogeneic BMT.** A, B6 Ly5.2 (CD45.1<sup>+</sup>) donor T cells were labeled with CellTrace and transferred to syngeneic (Syn) or allogeneic (GVHD) recipients. T cells were recovered on days 4, 8 and 12 post-BMT, stained for PD-1 and the percentage of PD-1<sup>Hi</sup> cells (of total donor CD4 cells) was quantitated. Plots are gated on CD45.1<sup>+</sup>, TCR- $\beta$ <sup>+</sup>, CD4<sup>+</sup> cells, n = 4-6 mice/group. B, For IFN- $\gamma$  staining, day 7 T cells were cultured for 6 hours on anti-CD3/CD28-coated plates in media containing brefeldin A, then stained for surface markers, fixed, permeabilized, and stained for intracellular IFN- $\gamma$  (left panel). T cells were similarly stained for intracellular Granzyme B, only without *ex vivo* stimulation (right panel). The percentage of IFN- $\gamma$ - and GzmB-positive cells was quantitated in donor CD45.1<sup>+</sup> TCR- $\beta$ <sup>+</sup> CD8a<sup>+</sup> cells. C, Donor T cells were harvested as in Supplementary Figure 1A, followed by measurement of total cellular ROS. Changes in CellROX MFI in donor CD4 T cells from multiple recipients were compared to the value in un-manipulated (naïve) T cells (set to relative value of 1), n = 4-6 mice/group. D, CellTrace-labeled C3H.SW donor T cells (Ly9.1<sup>+</sup>) were transferred to irradiated B6 recipients (miHC-mismatched BMT) and recovered on day 10 post-transplant. Ly9.1<sup>+</sup> TCR- $\beta$ <sup>+</sup> donor cells were then stained for CD4 versus CD8, PD-1, and ROS similar to Figure 1D. CellROX MFI differences were then quantitated in well-divided PD-1<sup>Lo</sup> and PD-1<sup>Hi</sup> T cells from multiple recipients, n = 3-5 mice/group. E, CellROX levels in divided syngeneic T cells were determined in PD-1<sup>Lo</sup> (lower left quadrant) versus PD-1<sup>Hi</sup> (upper left quadrant) cells as shown in Figure 1A. In the remainder of cases, gating for PD-1<sup>Lo</sup> and PD-1<sup>Hi</sup> subsets was done as shown in Figure 1C. \*\*p < 0.01, \*\*\*p < 0.001

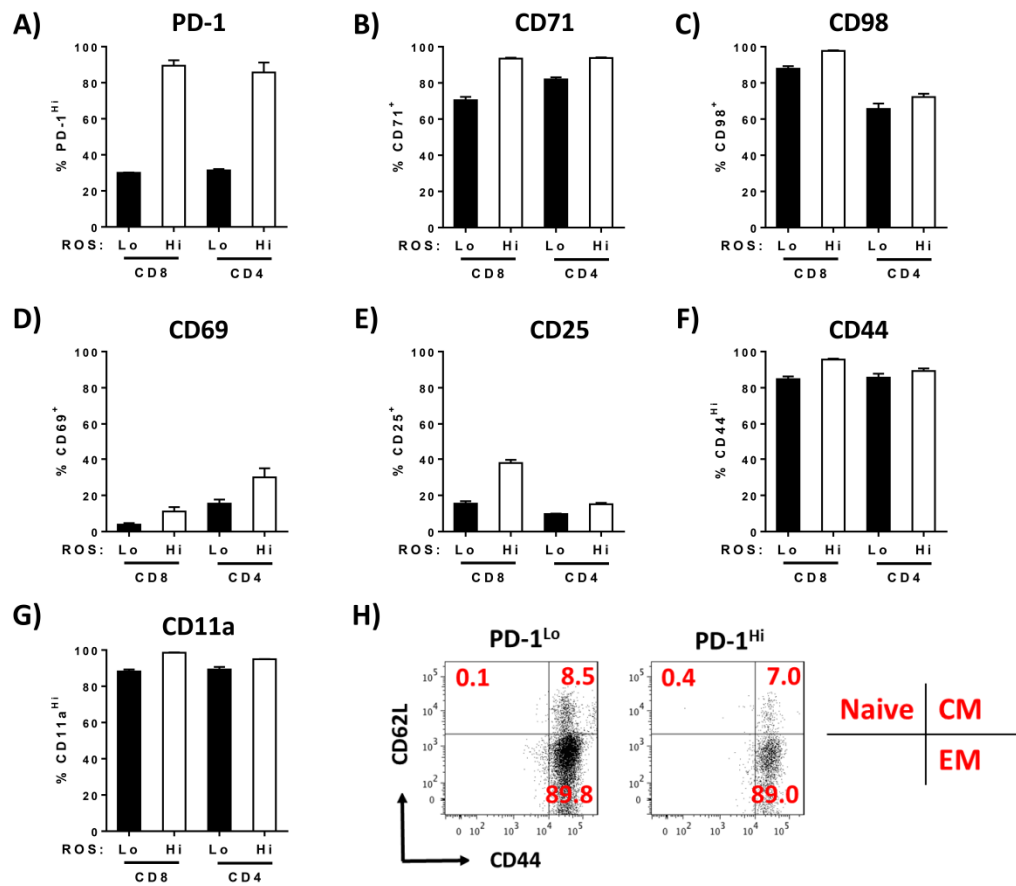

**Supplementary Figure 2. In allogeneic T cells, ROS levels correlate specifically with PD-1 status.** A-G, B6 Ly5.2 (CD45.1<sup>+</sup>) T cells were labeled with CellTrace and transferred to irradiated, B6D2F1 allogeneic recipients. On day 7 post-BMT, donor T cells were stained for activation markers, cell surface markers, and cellular ROS levels as in Supplementary Figure 1. The percentage of CD71<sup>+</sup>, CD98<sup>+</sup>, CD69<sup>+</sup>, CD25<sup>+</sup>, CD11a<sup>Hi</sup>, or CD44<sup>Hi</sup> cells was then quantified in ROS<sup>Lo</sup> versus ROS<sup>Hi</sup> T cells from either CD8 (left) or CD4 (right) T cell subsets. H, The percentage of cells with naïve (CD44<sup>Lo</sup>CD62L<sup>Hi</sup>), central-memory (CD44<sup>Hi</sup>CD62L<sup>Hi</sup>) and effector-memory (CD44<sup>Hi</sup>CD62L<sup>Lo</sup>) phenotypes was quantified in PD-1<sup>Lo</sup> versus PD-1<sup>Hi</sup> donor CD8 T cells. PD-1<sup>Lo</sup> versus PD-1<sup>Hi</sup> subsets were gated as shown in Figure 1C.

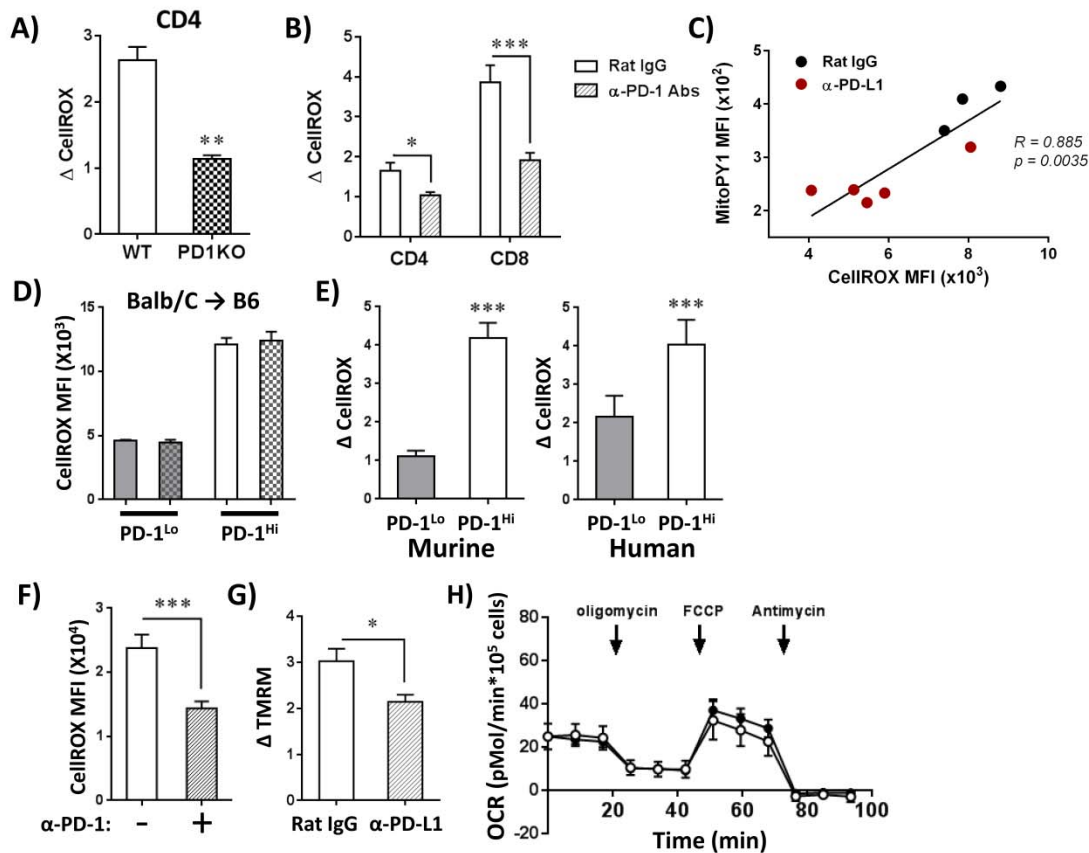

**Supplementary Figure 3. PD-1 controls cellular ROS levels in murine and human alloreactive T cells.** A, Wild-type (WT) or PD-1 knockout (PD-1KO) T cells were transferred to B6D2F1 recipients and changes in CellROX MFI measured day on 7 post-BMT in CD4<sup>+</sup> WT PD-1<sup>Hi</sup> versus PD-1KO T cells, n = 3-5 mice/group. B, B6 into F1 recipient mice were treated with anti-PD-1 blocking antibodies (or Rat IgG control) and ROS levels measured on day 7 in donor PD-1<sup>Hi</sup> CD4 and CD8 T cells. Staining and gating similar to Figure 2D, n = 3-5 mice/group. C, B6 into B6D2F1 recipients were treated with anti-PD-L1 blocking antibodies, followed on day 7 by simultaneous measurement of total cellular ROS (CellROX) and mitochondrial H<sub>2</sub>O<sub>2</sub> (MitoPY1) in donor, PD-1<sup>Hi</sup>, CD8 T cells. Linear regression between CellROX and MitoPy1 was then calculated, n = 3-5 mice/group. D, CFSE-labeled Balb/C T cells were transplanted into irradiated WT (solid) or PD-L1KO (hatched) recipients. Donor T cells were recovered on day 5 post-BMT and assessed for cellular ROS in PD-1<sup>Lo</sup> versus PD-1<sup>Hi</sup> T cells, n = 3-4/group. PD-1<sup>Lo</sup> versus PD-1<sup>Hi</sup> subset gating as performed similar to Figure 1C. E, Murine and human T cells were plated in MLRs (outlined in Figure 3) and harvested on day 4 (murine) or day 6 (human). PD-1 expression and ROS levels were then measured in PD-1<sup>Lo</sup> (left lower quadrant) versus PD-1<sup>Hi</sup> (left upper quadrant) CD4<sup>+</sup> T cells. F, Human MLR cultures were treated with anti-PD-1 antibodies on days 0, 3, and 6. Eight hours after the final treatment, ROS levels were measured in CD4<sup>+</sup>, PD-1<sup>Hi</sup> cells; n = 8 independent human samples. G, B6 into F1 recipients were treated with anti-PD-L1 antibodies (or Rat IgG control) as in Figure 2C. On day 7 post-transplant, mitochondrial transmembrane potential was measured in donor CD8<sup>+</sup> T cells. H, BMT and treatment as in Figure 4A (solid circles = anti-PD-L1 antibodies, open circles = Rat IgG control). On Day 7 post-BMT, donor T cells were isolated, pretreated with 100 μM Etomoxir for 15 minutes, and applied to Seahorse XF24 analyzer to measure oxygen consumption rates (OCR). \*p<0.05, \*\*p<0.01, \*\*\*p<0.001

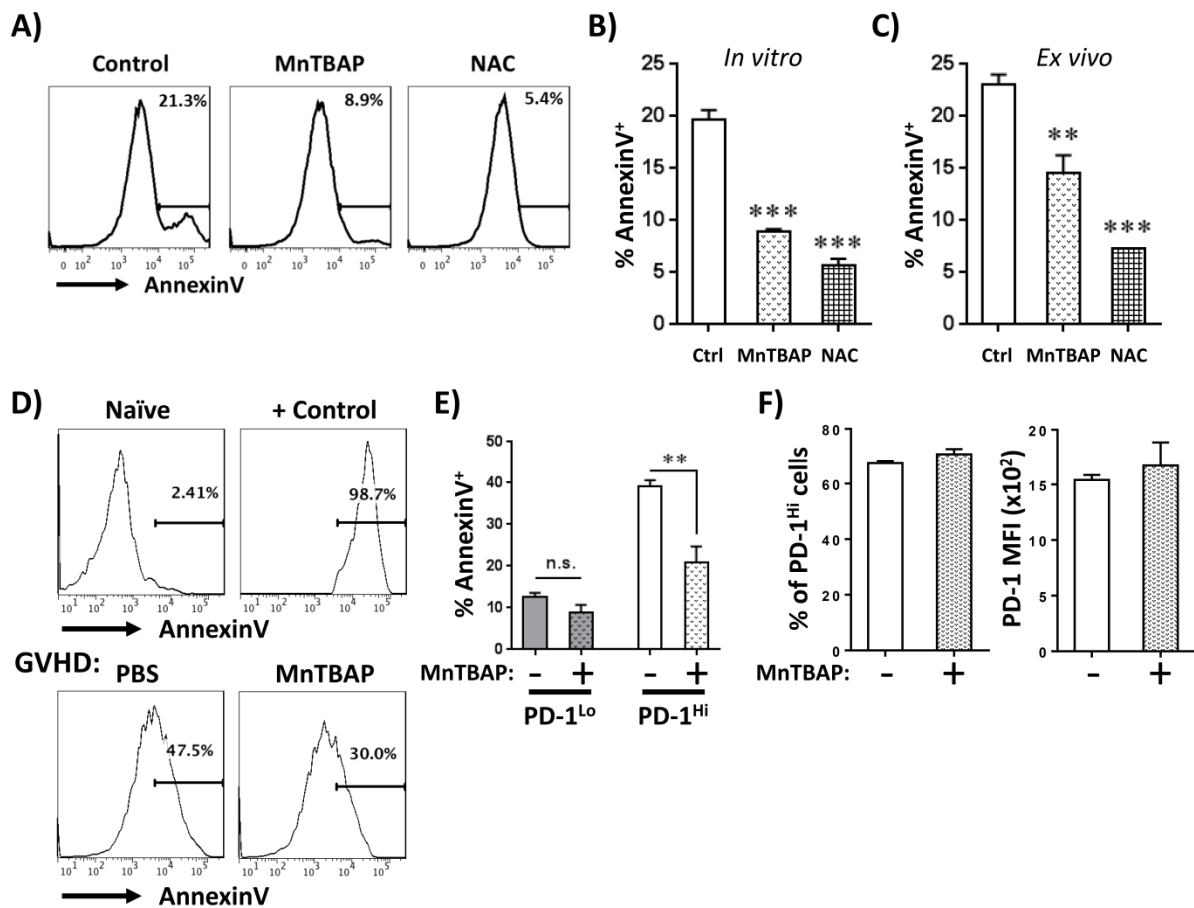

**Supplementary Figure 4. Antioxidants protect PD-1<sup>Hi</sup> T cells from apoptosis.** A, OT-I T cells were stimulated *in vitro* with CAG-OVA splenocytes as detailed in Materials and Methods. Anti-oxidant compounds MnTBAP (100  $\mu$ M) or NAC (10 mM) were added at 48 hours, cells harvested the following day, and donor T cells (CD45.2<sup>+</sup>TCR $\beta$ <sup>+</sup>CD8<sup>+</sup>) stained for AnnexinV. B, The percentage of AnnexinV<sup>+</sup> cells was quantified in TCR $\beta$ <sup>+</sup>CD8<sup>+</sup> OT-I cells from multiple replicates, n = 5 donors/group. C, Donor T cells from B6 into B6D2F1 recipients were purified on day 7 post-BMT and plated with B6D2F1 splenocytes for 24 hours. MnTBAP (100  $\mu$ M) or NAC (10 mM) were added at the time of re-stimulation. After 24 hours, donor T cells were stained for surface markers and AnnexinV as in Supplementary Figure 4B. The percentage of AnnexinV<sup>+</sup> cells was then quantitated in donor PD-1<sup>Hi</sup> CD8 T cells. PD-1<sup>Hi</sup> subset gated as in Figure 1C, n = 5 recipient mice/group. D, B6 into B6D2F1 recipients were treated with PBS or MnTBAP on day 7 post-BMT, donor cells recovered the following day, and donor CD4 or CD8 T cells (CD45.1<sup>+</sup>, TCR- $\beta$ <sup>+</sup>) stained for PD-1 and AnnexinV. E, The percentage of AnnexinV<sup>+</sup> cells in donor PD-1<sup>Lo</sup> or PD-1<sup>Hi</sup> CD4 T cells was quantitated from multiple recipients, per primary data in Supplementary Figure 4D. F, Cells were harvested and stained similar to Figure 5C. Graphs represent the percentage of PD-1<sup>Hi</sup> T cells (left) or the MFI of PD-1 staining (right) on donor CD8 T cells from multiple recipients, n = 5 mice/group. \*p < 0.05, \*\*p < 0.01, \*\*\*p < 0.001
